# Supplementary material for: TLR4 Mediates Pneumolysin-Induced ATF3 Expression through the JNK/p38 Pathway in Streptococcus pneumoniae-Infected RAW 264.7 Cells
Source: PubMed Central journal article supplement — Mol Cells. 2014 Dec 16;38(1):58–64. doi: 10.14348/molcells.2015.2231 (PMC4314132; doi:10.14348/molcells.2015.2231), 2014-12-16
Supplement: molcell-38-1-58-supple.pdf [file molcell-38-1-58-supple.pdf]

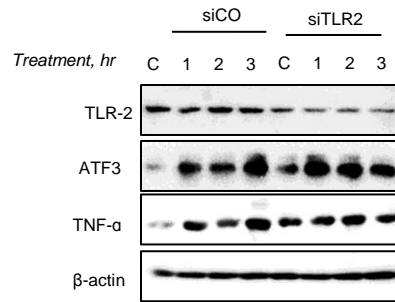

**Figure S1**

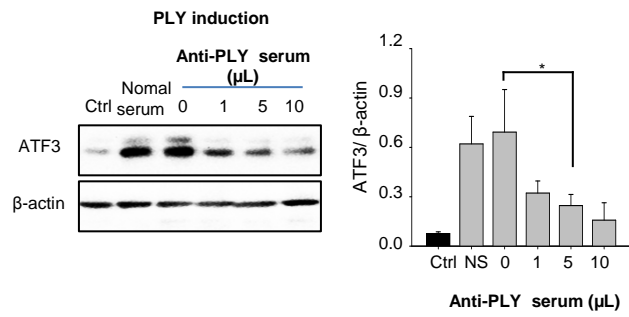

**Figure S2**

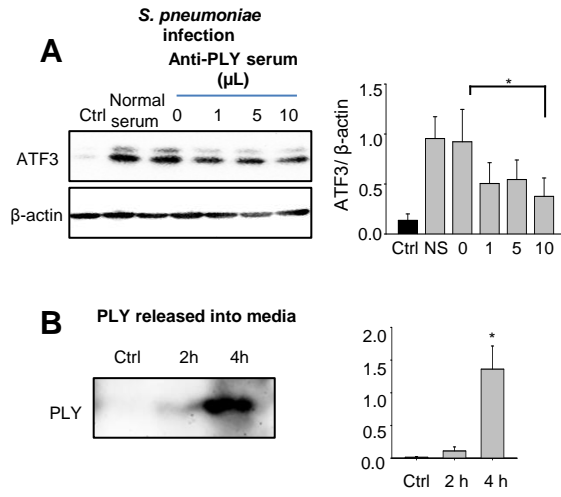

**Figure S3**

## Supplement Figure legends

### **Figure S1. PLY-dependent ATF3 and TNF- $\alpha$ induction is not mediated by TLR2.**

RAW 264.7 cells were transfected with siTLR2 for 24 hr and then incubated with 500 ng/ml of PLY for 0, 1, 2, or 3 hr. Subsequently, the cell lysates were analyzed by Western blotting. The data are representative of two independent experiments.

### **Figure S2. Impairment of ATF3 induction by PLY antibody.**

RAW 264.7 cells were incubated with purified PLY in the presence or absence of anti-PLY serum for 2 hr. Cell lysates were collected for a Western blot analysis. Dose-dependent impairment of ATF3 induction was detected. The data are representative of three independent experiments and analyzed by one-way ANOVA. Data are shown as mean  $\pm$  S.D. \* $P < 0.05$ .

### **Figure S3. Release of PLY into the culture media by pneumococcal infection.**

(A) RAW 264.7 cells were infected with *S. pneumoniae* in the presence or absence of anti-PLY serum for 2 hr. Cell lysates were collected for a Western blot analysis. A dose-dependent decrease in the ATF3 level was detected. (B) RAW 264.7 cells were infected with *S. pneumoniae* for 2 and 4 hr. Cell supernatants were collected, and proteins were precipitated by 10% Trichloroacetic acid and used for Western blots to detect PLY. The data are representative of three independent experiments and were analyzed by one-way ANOVA. Data are shown as mean  $\pm$  S.D. \* $P < 0.05$ .
